# Supplementary material for: Ternary behavior and systematic nanoscale manipulation of domain structures in P3HT/PCBM/P3HT-b-PEO films
Source: Royal Society of Chemistry journal article supplement (doi:10.1039/c2jm31124k), 2012-01-01
Supplement: c2jm31124k.pdf [file c2jm31124k.pdf]

## Supplementary Information

### Ternary Behavior and Systematic Manipulation of Domain Structures in P3HT/PCBM/P3HT-*b*-PEO Films

*Jihua Chen*<sup>1\*</sup>, *Xiang Yu*<sup>2</sup>, *Kunlun Hong*<sup>1</sup>, *Jamie M. Messman*<sup>1</sup>, *Deanna L. Pickel*<sup>1</sup>, *Kai Xiao*<sup>1</sup>, *Mark Dadmun*<sup>2,3</sup>, *Jimmy W. Mays*<sup>1,2,3</sup>, *Adam J. Rondinone*<sup>1</sup>, *Bobby G. Sumpter*<sup>1,4</sup>, and *S. Michael Kilbey II*<sup>1,3\*</sup>

<sup>1</sup> *Center for Nanophase Materials Sciences, Oak Ridge National Laboratory, Oak Ridge, TN 37831*

<sup>2</sup> *Chemical Sciences Division, Oak Ridge National Laboratory, Oak Ridge, TN 37831*

<sup>3</sup> *Department of Chemistry, University of Tennessee, Knoxville, TN 37996*

<sup>4</sup> *Computer Science & Mathematics Division, Oak Ridge National Laboratory, Oak Ridge, TN 37831*

\* Corresponding authors: Jihua Chen: [nh3@ornl.gov](mailto:nh3@ornl.gov), S. Michael Kilbey II: [mkilbey@utk.edu](mailto:mkilbey@utk.edu)

### Synthesis Scheme

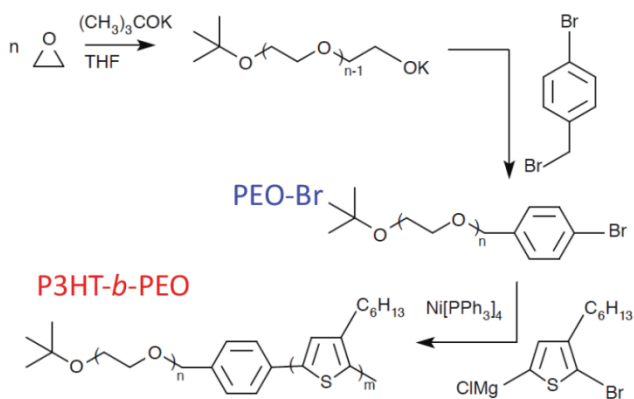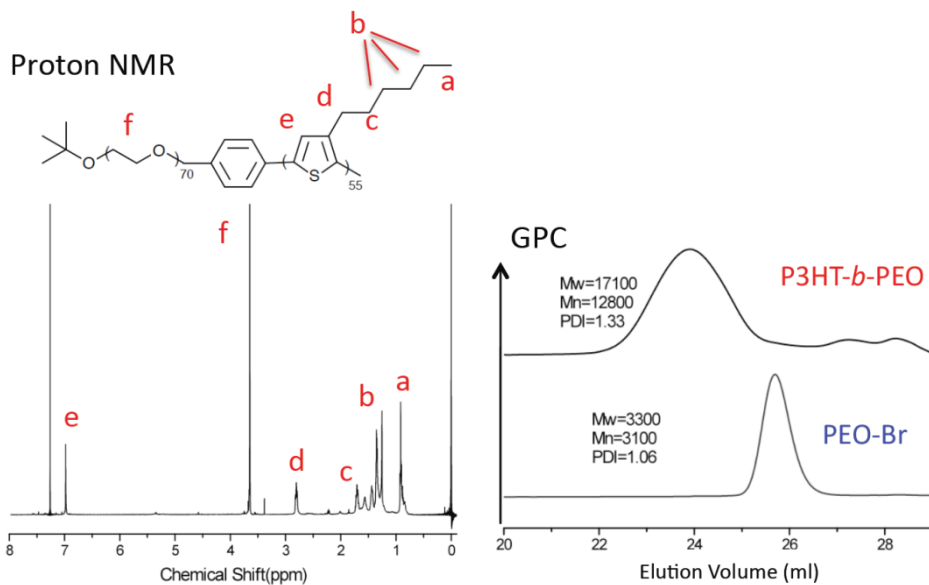

**Figure S1.** Synthesis scheme of P3HT-*b*-PEO (top). Proton NMR and GPC results are also shown for the particular diblock used in this work (bottom).

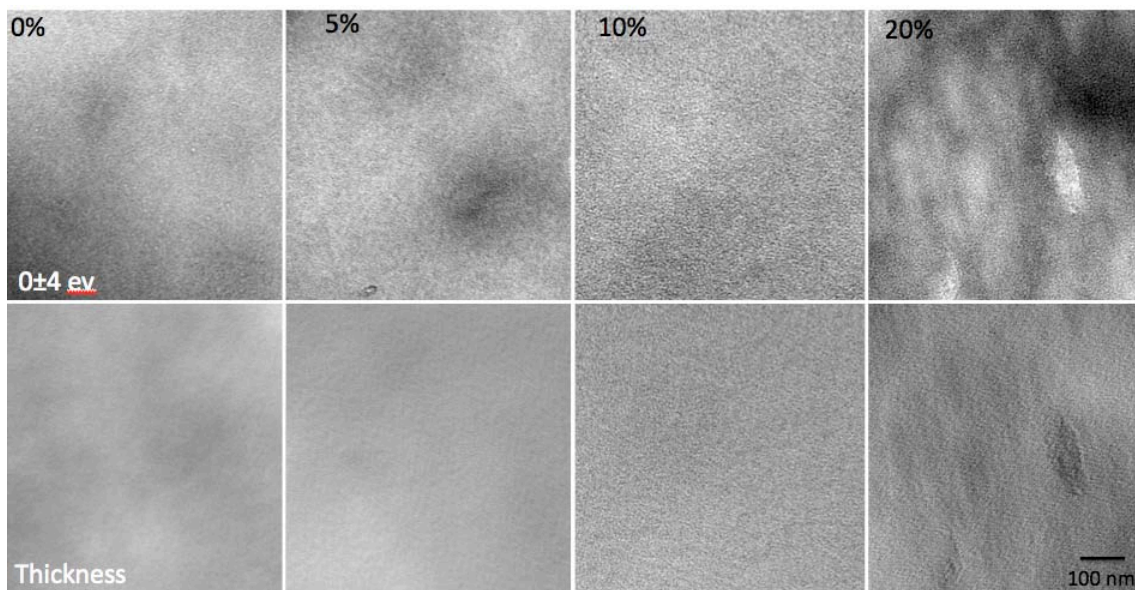

**Figure S2.** Thickness maps and 0 eV images of thermally annealed (120°C, 30 min) P3HT/PCBM films with different weight percentages (0%, 5%, 10%, and 20%) of P3HT-*b*-PEO block copolymer.

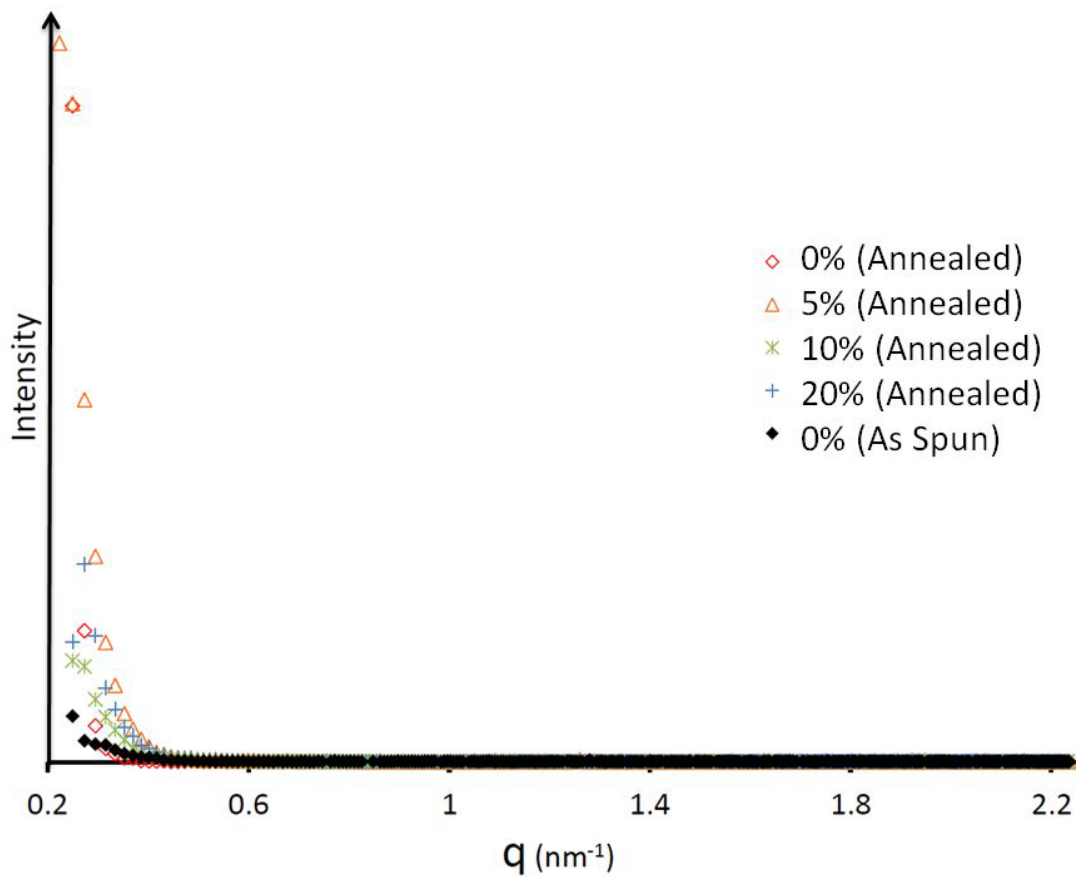

**Figure S3.** GISAXS results of P3HT/PCBM/P3HT-*b*-PEO ternary films before and after thermal annealing as a function of P3HT-*b*-PEO loading in *I* - *q* format.

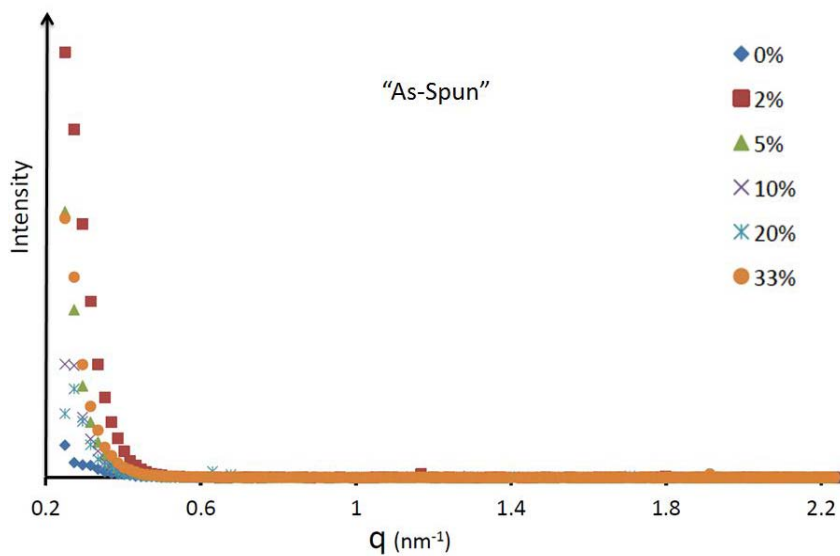

**Figure S4.** GISAXS results of P3HT/PCBM/P3HT-*b*-PEO ternary films before thermal annealing as a function of P3HT-*b*-PEO loading (0-33wt%) in  $I - q$  format.

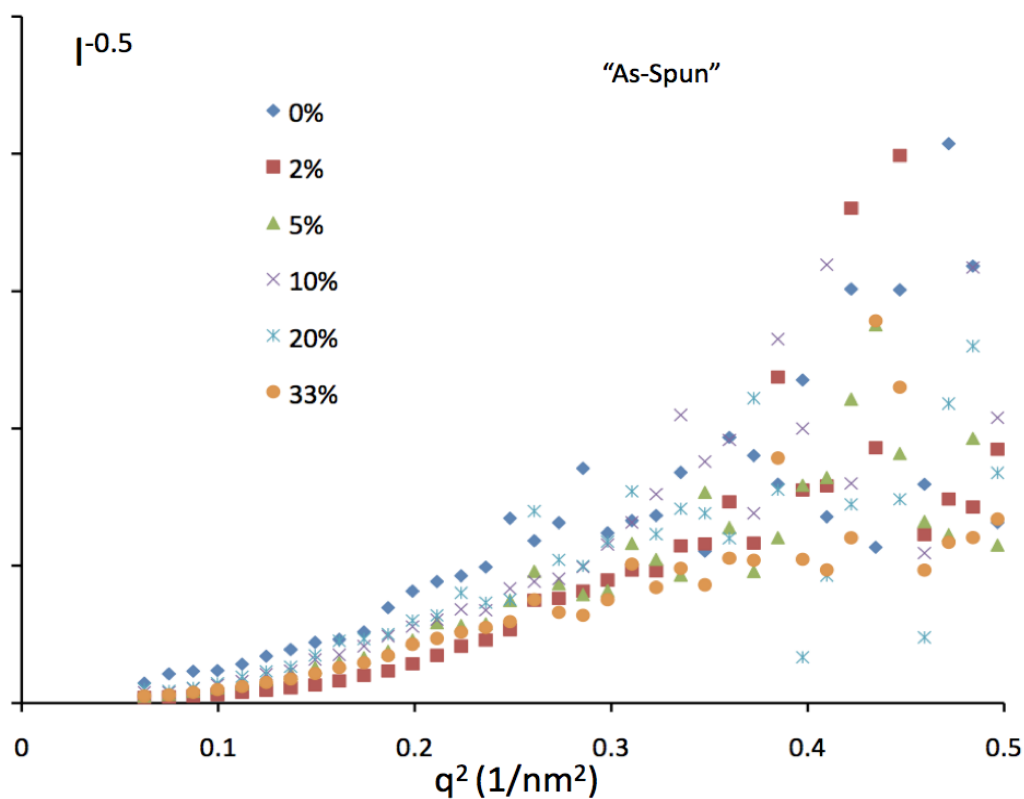

**Figure S5.** GISAXS results of P3HT/PCBM/P3HT-*b*-PEO ternary films before thermal annealing as a function of P3HT-*b*-PEO loading (0-33wt%) in  $I^{0.5} - q^2$  format
